# Supplementary material for: Comparative analysis of population-based and personalized reference intervals for biochemical markers in peri-menopausal women: population from the PALM cohort study
Source: publisher site journal article supplement (doi:10.1515/cclm-2025-0658), 2025-05-30

**Supplemental Table A1.** Overview of units, instruments and methods used for the clinical chemistry and hormone measurands included in the study.

| Measurands | Unit | Instruments | Methods |
| --- | --- | --- | --- |
| GLU | mmol/L | Beckman AU 5800 | Hexokinase method |
| TC | mmol/L | Beckman AU 5800 | Cholesterol oxidase method |
| HDL-C | mmol/L | Beckman AU 5800 | Enzymatic method |
| P | mmol/L | Beckman AU 5800 | Phosphomolybdate ultraviolet endpoint method |
| ALT | U/L | Beckman AU 5800 | Rate method |
| ALP | U/L | Beckman AU 5800 | Rate assay (AMP buffer) |
| Ca | mmol/L | Beckman AU 5800 | Azo arsenic III method |
| TG | mmol/L | Beckman AU 5800 | Go free glycerol |
| Mg | mmol/L | Beckman AU 5800 | Xylaniline blue method |
| E2 | pg/mL | Roche Elecsys 2010 | Electrochemiluminescence |
| T | nmol/L | Roche Elecsys 2010 | Electrochemiluminescence |
| Crea | µmol/L | Beckman AU 5800 | Enzymatic method |
| FSH | IU/L | Roche Elecsys 2010 | Electrochemiluminescence |

GLU, glucose; TC, total cholesterol; HDL-C, high-density lipoprotein cholesterol; P, phosphorus; ALT, alanine aminotransferase; ALP, alkaline phosphatase; Ca, calcium; TG, triglycerides; Mg, magnesium; E2, estradiol; T, testosterone; Crea, creatinine; FSH, follicle-stimulating hormone.

**Supplemental Table A2.** Simplified staging criteria for female reproductive aging based on the Stages of Reproductive Aging Workshop + 10 (STRAW+10) [20].

| **Terminology** | **Reproductive** | **Menopausal Transition** | | **Postmenopause** | |
| --- | --- | --- | --- | --- | --- |
|  | **Perimenopause a** | | |  |
| **Principal criteria** | | | | | |
| Menstrual cycles | Regular or subtle changes in flow/length | **Early (Stage -2):** difference in length between consecutive cycles ≥ 7 days, occurring more than once in 10 cycles | **Late (Stage -1):** amenorrhea lasting ≥ 60 days | Amenorrhea for ≥ 12 consecutive months; retrospective confirmation of the final menstrual period (FMP) | |
| **Supportive criteria** | | | | | |
| FSH | Normal/low/variable a | ↑ Variable b | ↑ ＞25 IU/L c | ↑ Variable/stabilizes | |
| AMH / Inhibin B | Normal/low | Low | Low | Very low | |
| Antral follicle count | Normal/low | Low | Low | Very low | |
| **Symptoms** | **-** | - | Vasomotor symptoms | Vasomotor symptoms or urogenital atrophic symptoms | |

a. Perimenopause is defined as the period from the onset of menstrual cycle variability (STRAW+10 Stage -2) to 12 months after the final menstrual period (FMP); b. Blood draw on cycle days 2-5; ↑ = elevated; c. Based on the approximate expected levels according to current international standards for pituitary hormones; FSH, follicle-stimulating hormone; AMH, anti-müllerian hormone.

**Supplemental Table A3.** Normality test results and number of outliers deleted for 13 biomarkers in the overall and three stages.

| Measurands | All | | REP | | MT | | POST | |
| --- | --- | --- | --- | --- | --- | --- | --- | --- |
| p-Valuea | Number of outliers deleted | p-Valuea | Number of outliers deleted | p-Valuea | Number of outliers deleted | p-Valuea | Number of outliers deleted |
| GLU, mmol/L | <0.001 | 23 | 0.05 | 17 | 0.11 | 9 | <0.001 | 5 |
| TC, mmol/L | <0.001 | 9 | 0.005 | 4 | 0.019 | 8 | 0.09 | 6 |
| HDL-C, mmol/L | <0.001 | 12 | 0.005 | 5 | 0.001 | 7 | <0.001 | 8 |
| P, mmol/L | 0.002 | 11 | 0.025 | 5 | 0.15 | 2 | 0.06 | 3 |
| ALT, U/L | <0.001 | 46 | <0.001 | 28 | <0.001 | 25 | <0.001 | 23 |
| ALP, U/L | <0.001 | 15 | 0.023 | 6 | 0.004 | 6 | 0.002 | 4 |
| Ca, mmol/L | 0.001 | 6 | 0.003 | 1 | 0.002 | 1 | 0.32 | 8 |
| TG, mmol/L | <0.001 | 41 | <0.001 | 17 | <0.001 | 23 | <0.001 | 25 |
| Mg, mmol/L | <0.001 | 12 | <0.001 | 7 | 0.007 | 2 | <0.001 | 4 |
| E2, pg/ml | <0.001 | 49 | <0.001 | 23 | <0.001 | 35 | 0.001 | 38 |
| T, nmol/L | <0.001 | 12 | 0.005 | 4 | 0.02 | 4 | <0.001 | 6 |
| Crea, µmol/L | 0.002 | 13 | 0.08 | 3 | 0.11 | 0 | 0.03 | 1 |
| FSH, IU/L | <0.001 | 14 | <0.001 | 42 | <0.001 | 32 | 0.54 | 5 |

a. Shapiro-Wilk test (n < 50) or Kolmogorov-Smirnov test (n ≥ 50).

b. Outliers were removed using Tukey's method.

GLU, glucose; TC, total cholesterol; HDL-C, high-density lipoprotein cholesterol; P, phosphorus; ALT, alanine aminotransferase; ALP, alkaline phosphatase; Ca, calcium; TG, triglycerides; Mg, magnesium; E2, estradiol; T, testosterone; Crea, creatinine; FSH, follicle-stimulating hormone; REP, reproductive; MT, menopausal transition; POST, postmenopause.

**Supplemental Table A4.** Results of the Kruskal-Wallis Test for the clinical chemistry measurands across three periods.

| Measurands | p-Value | | | |
| --- | --- | --- | --- | --- |
| REP vs MT | REP vs POST | MT vs POST | Overall |
| GLU, mmol/L | <0.01 | <0.001 | <0.001 | <0.001 |
| TC, mmol/L | <0.001 | <0.001 | <0.001 | <0.001 |
| HDL-C, mmol/L | - | - | - | 0.17 |
| P, mmol/L | 0.99 | <0.001 | <0.001 | <0.001 |
| ALT, U/L | <0.001 | <0.001 | <0.001 | <0.001 |
| ALP, U/L | <0.001 | <0.001 | <0.001 | <0.001 |
| Ca, mmol/L | 0.35 | <0.001 | <0.001 | <0.001 |
| TG, mmol/L | <0.001 | <0.001 | <0.001 | <0.001 |
| Mg, mmol/L | - | - | - | 0.11 |
| E2, pg/ml | <0.001 | <0.001 | <0.001 | <0.001 |
| T, nmol/L | <0.001 | <0.001 | <0.01 | <0.001 |
| Crea, µmol/L | <0.001 | <0.001 | <0.001 | <0.001 |
| FSH, IU/L | <0.001 | <0.001 | <0.001 | <0.001 |

GLU, glucose; TC, total cholesterol; HDL-C, high-density lipoprotein holesterol; P, phosphorus; ALT, alanine aminotransferase; ALP, alkaline phosphatase; Ca, calcium; TG, triglycerides; Mg, magnesium; E2, estradiol; T, testosterone; Crea, creatinine; FSH, follicle-stimulating hormone; REP, reproductive; MT, menopausal transition; POST, postmenopause.

**Supplemental Table A5. Comparison of CVI and CVG estimates for six measurands across different studies.**

| Measurands | Group | CVI%  (95% CI) | CVG  (95% CI) | EFLM database (2025) a [28] | | Wang S et al. (2022) b [27] | | Coşkun A et al. (2023) c [26] | |
| --- | --- | --- | --- | --- | --- | --- | --- | --- | --- |
| CVI% (95% CI) | CVG% (95% CI) | CVI% (95% CI) | CVG% (95% CI) | CVI% (95% CI) | CVG% (95% CI) |
| GLU,  mmol/L | All | 5.4(5.3-5.7) | 6.2(5.6-6.8) | 4.7(3.0-5.4) | 8.0(2.7-10.8) | 5.1(5.0-5.2) | 5.1(4.5-5.9) | 5.6(4.8-6.7) | 5.3(3.7-8.2) |
| REP | 4.6(4.1-5.2) | 6.5(4.6-9.1) |  |  |  |  |  |  |
| MT | 5.5(5.1-5.9) | 6.1(5.0-7.4) |  |  |  |  |  |  |
| POST | 5.3(5.0-5.6) | 6.0(5.1-7.1) |  |  |  |  |  |  |
| TC,  mmol/L | All | 8.6(8.2-8.9) | 14.3(12.9-15.8) | 5.4(4.9-6.4) | 15.6(12.9-17.4) | 11.1(9.8-12.8) | 10.9(7.9-16.3) | 5.4(4.5-6.6) | 17.8(13.5-26.1) |
| REP | 7.2(6.4-8.2) | 13.0(9.3-18.1) |  |  |  |  |  |  |
| MT | 7.9(7.3-8.4) | 14.8(12.3-17.9) |  |  |  |  |  |  |
| POST | 9.3(8.7-9.9) | 13.3(11.2-15.7) |  |  |  |  |  |  |
| ALT,  U/L | All | 35.0(33.7-36.3) | 40.0(34.0-46.3) | 11.2(9.3-16.0) | 35.2(28.0-41.6) | 40.2(35.3-46.8) | 27.6(17.7-44.0) | 12.4(10.6-14.7) | 21.1(15.5-31.5) |
| REP | 28.4(24.7-32.8) | 27.2(16.8-41.1) |  |  |  |  |  |  |
| MT | 35.6(33.1-38.3) | 32.4(10.8-48.4) |  |  |  |  |  |  |
| POST | 32.8(30.8-35.0) | 45.6(37.5-55.0) |  |  |  |  |  |  |
| TG,  mmol/L | All | 28.5(27.4-29.5) | 46.6(42.1-51.5) | 19.8(17.8-21.6) | 34.3(30.1-40.3) | 28.1(24.9-32.5) | 24.7(17.4-37.1) | 19.1(16.5-22.7) | 34.9(25.5-53.7) |
| REP | 45.8(40.3-52.2) | 29.3(10.3-47.7) |  |  |  |  |  |  |
| MT | 25.2(23.3-26.9) | 43.4(35.9-52.5) |  |  |  |  |  |  |
| POST | 27.8(26.2-29.6) | 41.2(34.0-49.4) |  |  |  |  |  |  |
| Crea,  µmol/L | All | 12.4(11.8-13.0) | 10.3(8.7-11.9) | 4.4(2.3-4.9) | 16.2(12.5-17.4) | 7.0(6.2-8.1) | 9.7(7.2-14.2) | 4.9(3.8-6.2) | 11.9(8.9-17.5) |
| REP | 13.0(11.1-15.2) | 7.7(2.6-13.2) |  |  |  |  |  |  |
| MT | 11.6(10.7-12.6) | 7.7(5.6-10.0) |  |  |  |  |  |  |
| POST | 11.2(10.3-12.1) | 11.22(8.8-14.0) |  |  |  |  |  |  |
| FSH,  IU/L | All | 44.0(42.2-45.9) | 97.4(87.6-108.3) | 9.5(8.6-17.3) | 19.8(17.8-21.6) | -d | - d | -d | - d |
| REP | 25.3(22.7-28.2) | 27.2(18.6-37.8) |  |  |  |  |  |  |
| MT | 65.6(61.1-70.5) | 63.7(48.2-81.0) |  |  |  |  |  |  |
| POST | 20.4(19.0-22.0) | 29.8(24.6-36.1) |  |  |  |  |  |  |

a. Data were from online European Federation of Clinical Chemistry and Laboratory Medicine (EFLM) biological variation database. b. Data were from female participants in the annual group of this study; c. Data were from female participants with weekly sampling; d. FSH data were not reported in these two studies; GLU, glucose; TC, total cholesterol; ALT, alanine aminotransferase; TG, triglycerides; Crea, creatinine; FSH, follicle-stimulating hormone; REP, reproductive; MT, menopausal transition; POST, postmenopause.

**Supplemental Figure A1**.Variable importance of predictors in the Random Forest model for menopausal status.


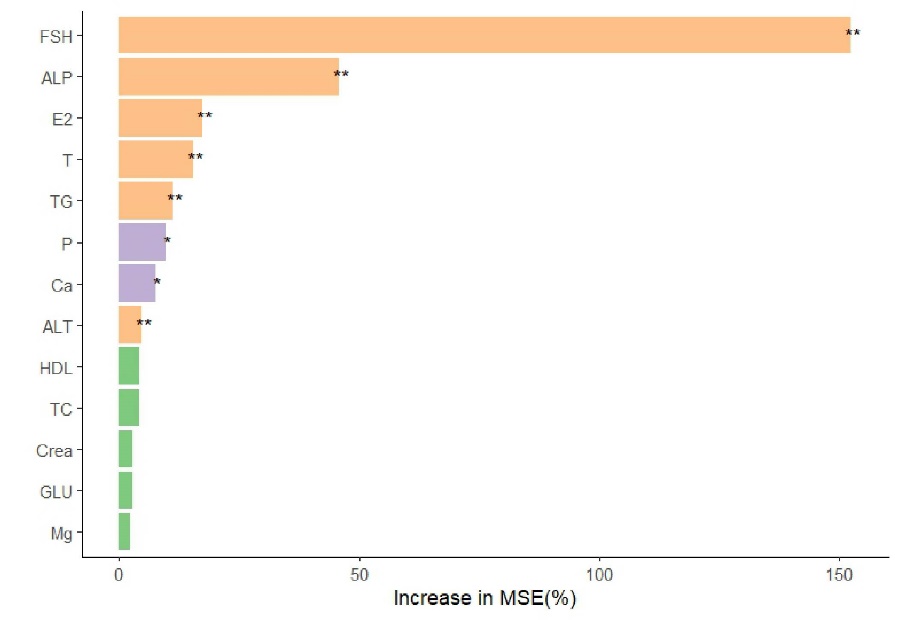


The bar plot illustrates the importance of each predictor variable in menopausal status, as measured by the percentage increase in mean squared error (MSE) when the variable is permuted. Variables with longer bars contribute more significantly to the menopausal status. Statistical significance is indicated by * (p < 0.05) and ** (p < 0.01).

**Supplemental Figure A2.** The personalized reference intervals for individuals in the reproductive, menopausal transition, and postmenopausal stages.

Vertical black error bars: prRIs (personalized reference intervals) for six measurands in the reproductive, menopausal transition, and postmenopausal stages, derived from CVP estimates; black dots: mean of six measurements per individual; blue horizontal lines: lower and upper limits of popRIs (population-based reference intervals).

GLU, glucose; TC, total cholesterol; ALT, alanine aminotransferase; TG, triglycerides; Crea, creatinine; REP, reproductive; MT, menopausal transition; POST, postmenopause; n, the number of individuals.


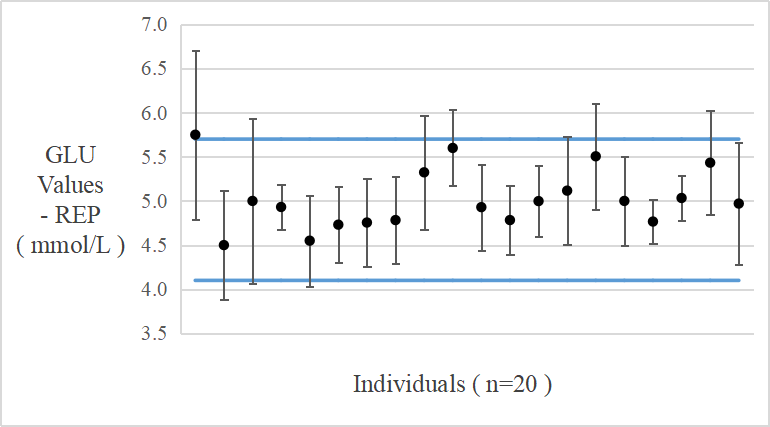


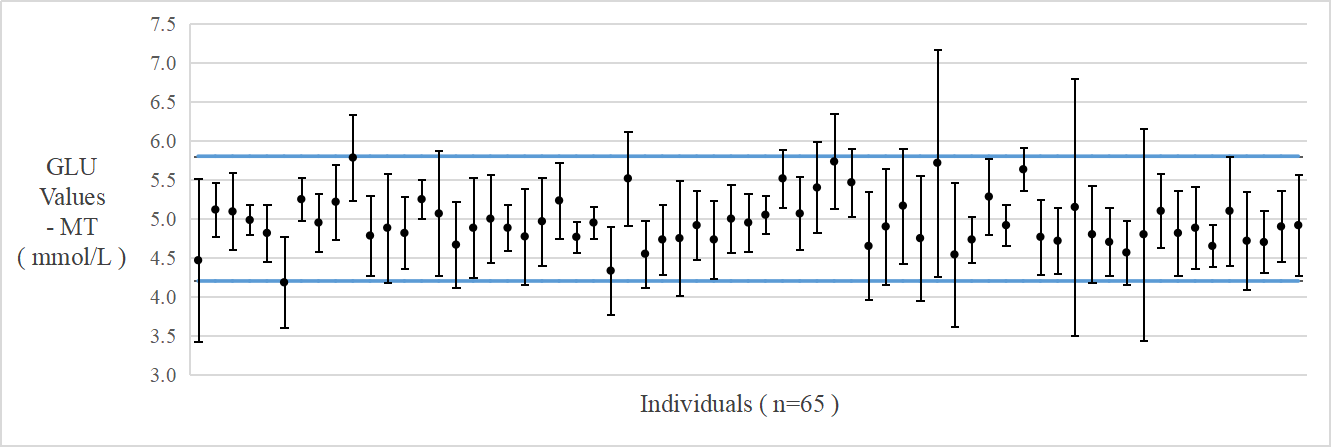

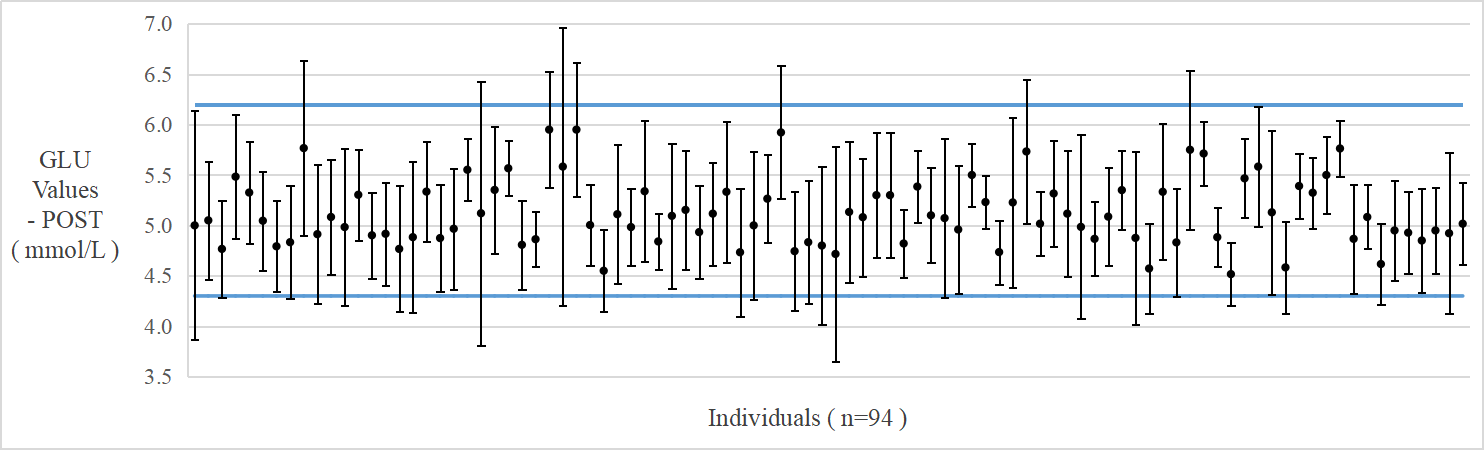


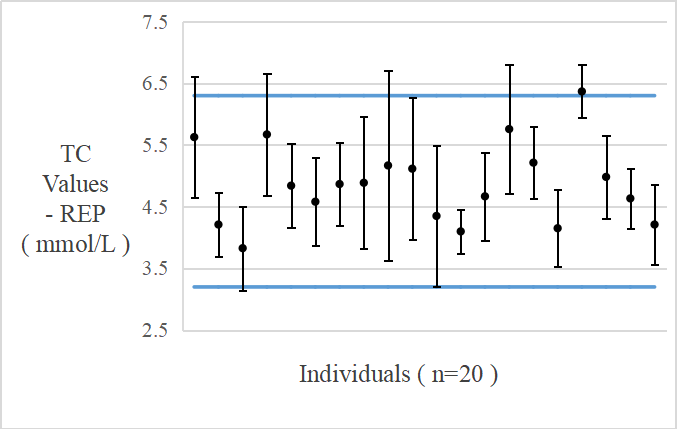


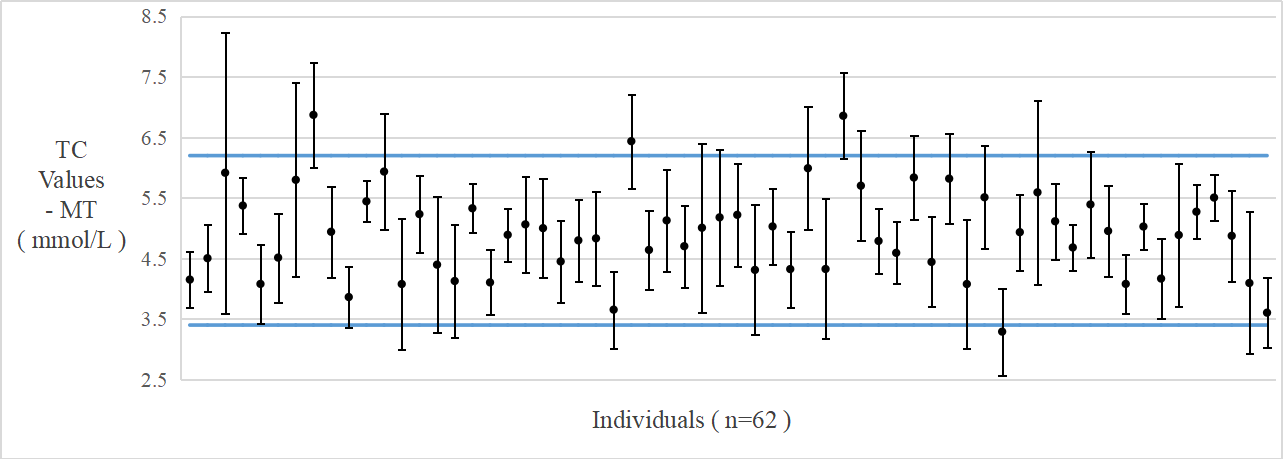


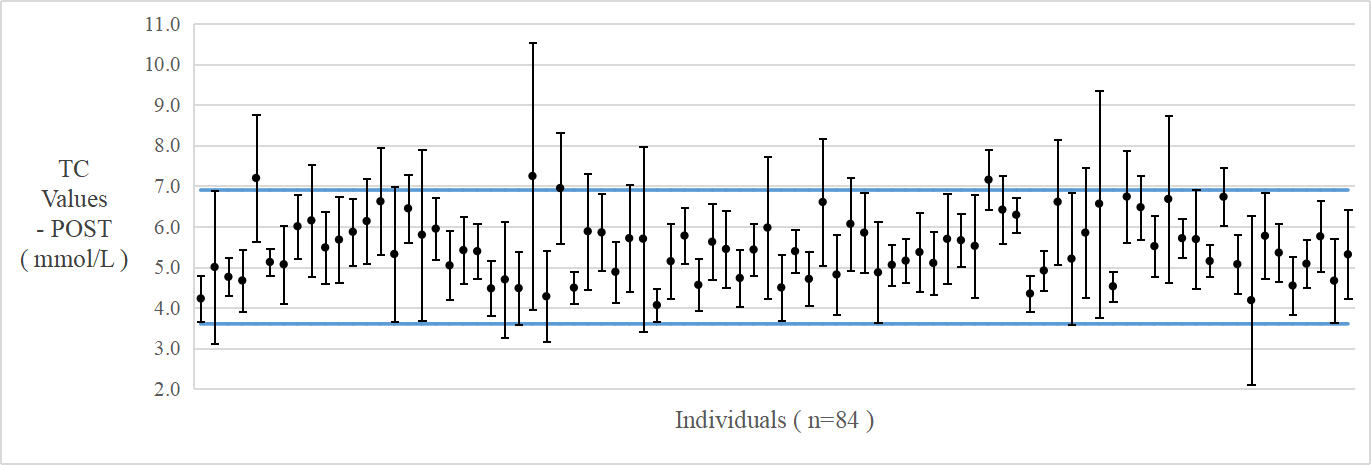


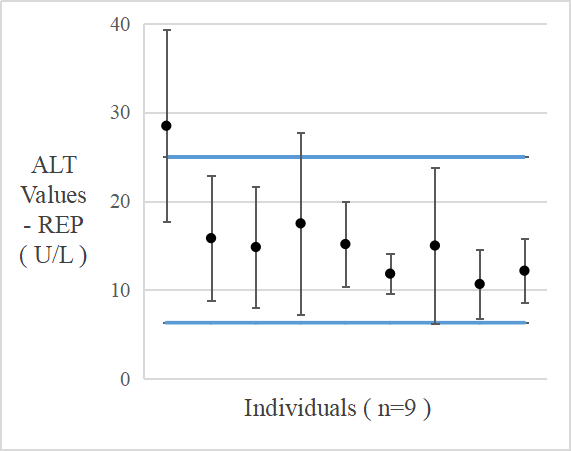

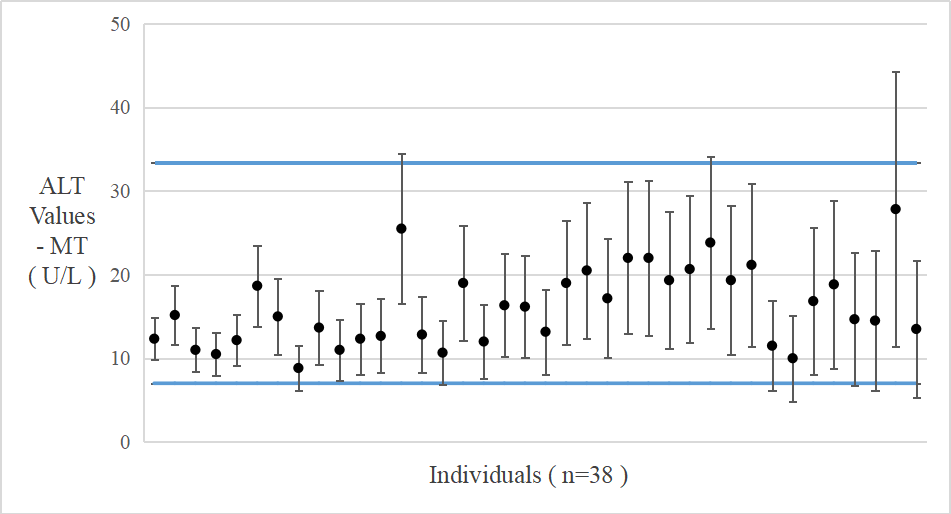

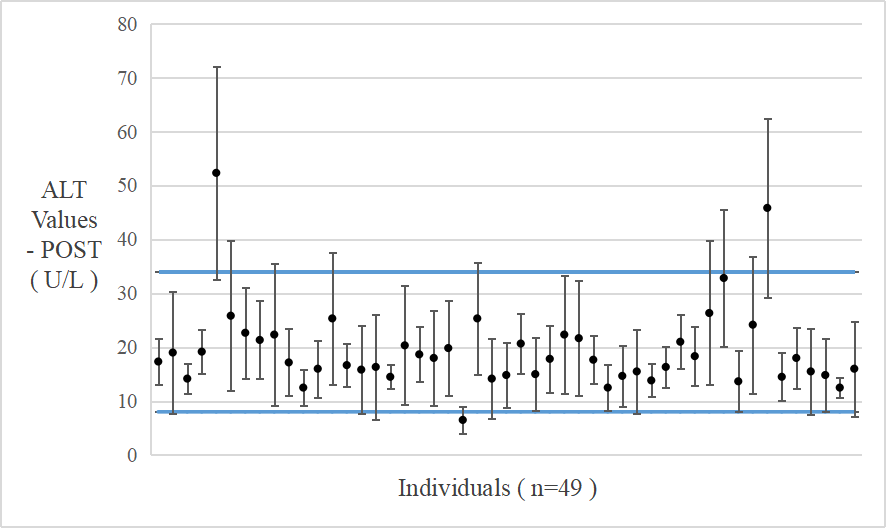


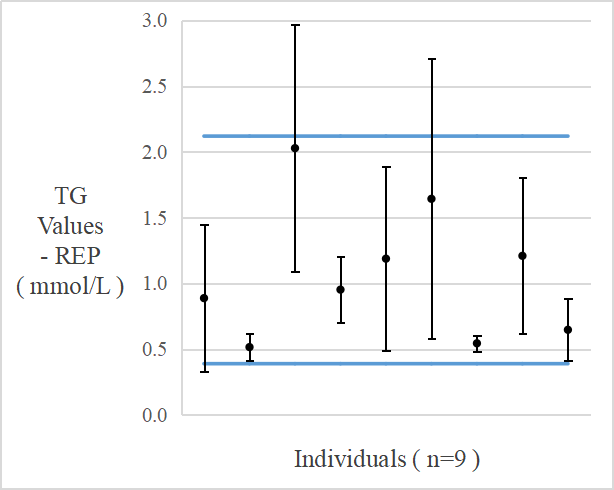

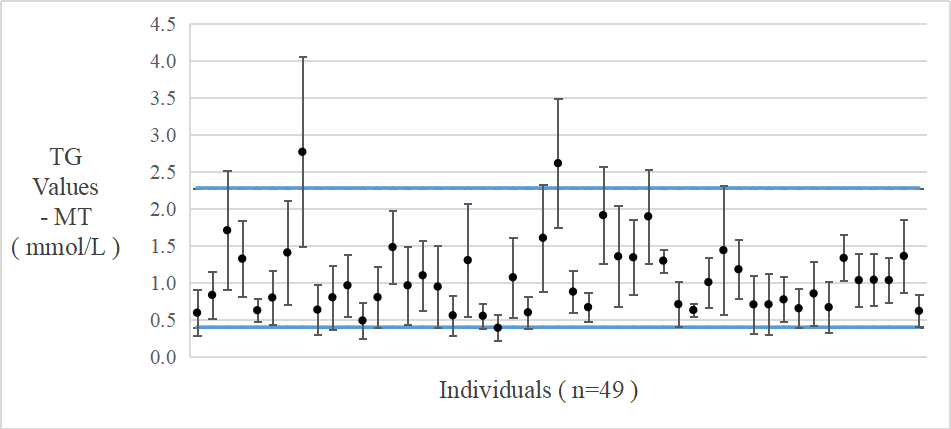

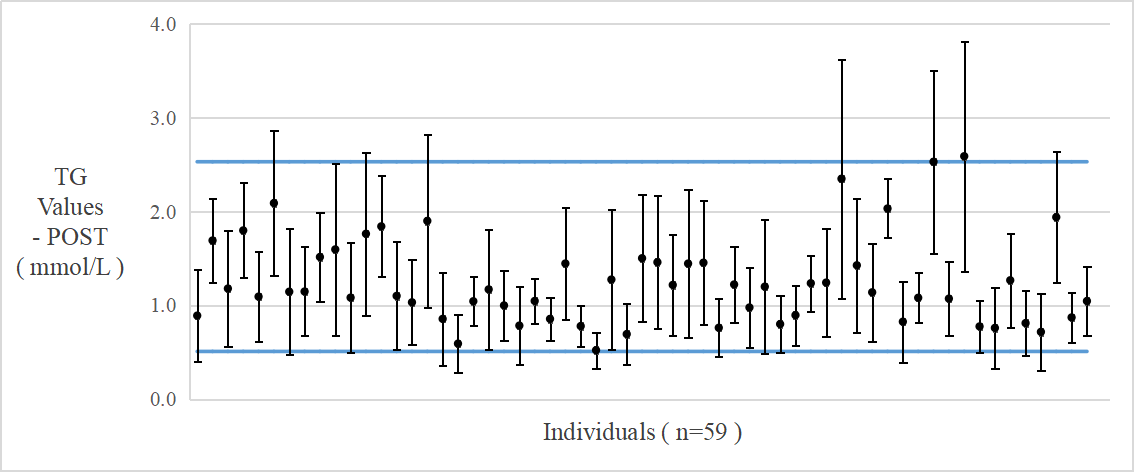


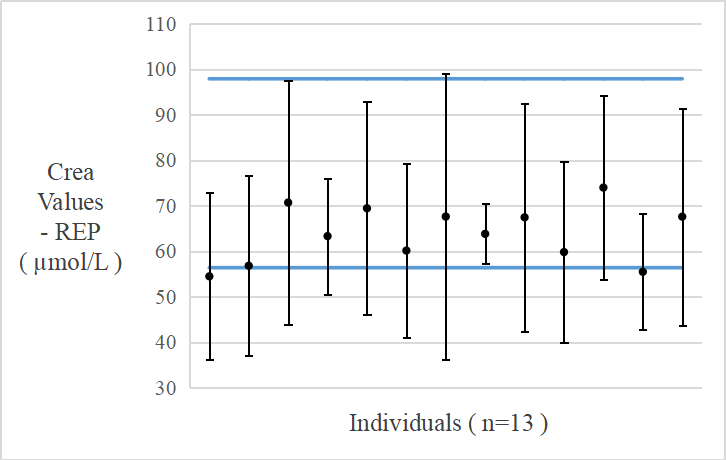


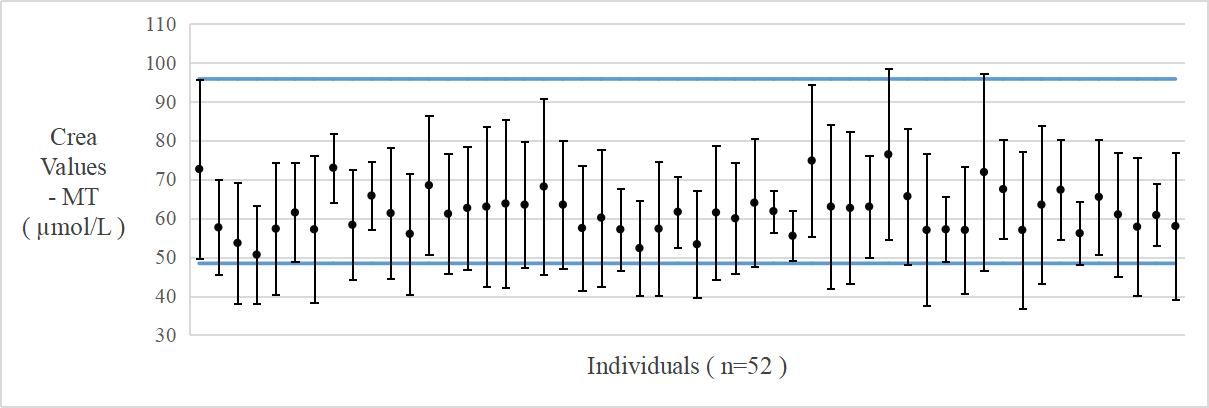


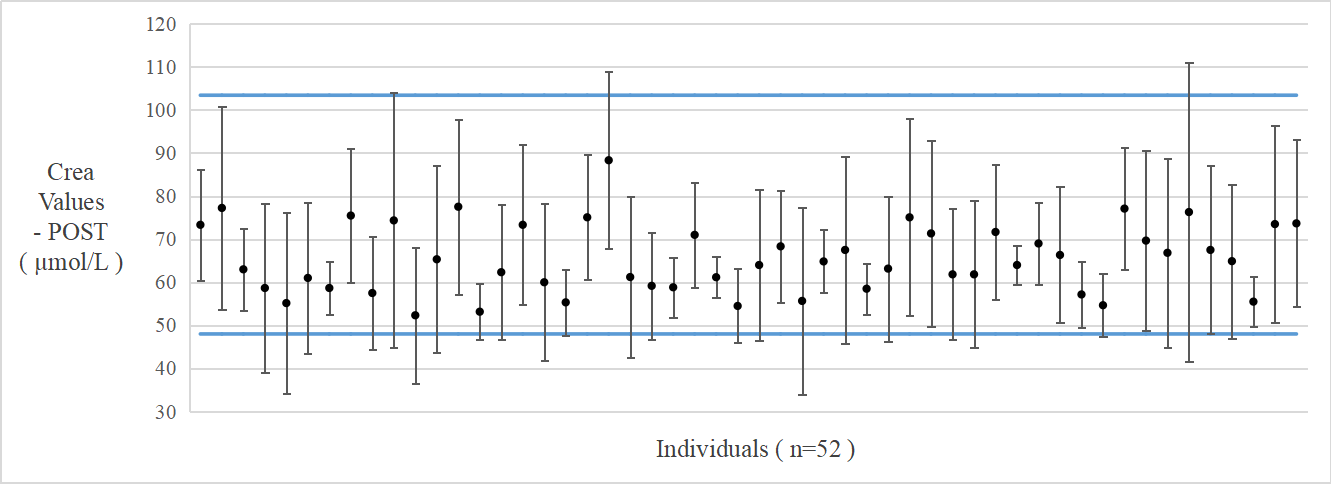

Supplement: Supplementary file 1 [file j_cclm-2025-0658_suppl_001.docx]
